# Supplementary material for: Synergistic effects between a non-ionic and an anionic surfactant on the micellization process and the adsorption at liquid/air surfaces
Source: Royal Society of Chemistry journal article supplement (doi:10.1039/d3sm01454a), 2023-12-20
Supplement: d3sm01454a1.pdf [file d3sm01454a1.pdf]

## Supporting information

Synergistic effects between a non-ionic and an anionic surfactant on the micellization process and the adsorption at liquid/air surfaces

Kristo Kotsi<sup>a</sup>, Teng Dong<sup>a</sup>, Takeshi Kobayashi<sup>b</sup>, Ian Mc Robbie<sup>c</sup>,  
Alberto Striolo<sup>b,d</sup>, Panagiota Angeli<sup>\*a</sup>

<sup>a</sup>ThAMeS Multiphase, Department of Chemical Engineering, University College London, Torrington Place, London, WC1E 7JE, UK

<sup>b</sup>Department of Chemical Engineering, University College London, Torrington Place, London, WC1E 7JE, UK

<sup>c</sup>Innospec Ltd, Oil Sites Road, Ellesmere Port, Cheshire, CH65 4EY, UK

<sup>d</sup>School of Sustainable Chemical, Biological and Materials Engineering, Sarkeys Energy Center, The University of Oklahoma, Norman, OK 73019, US

\*Corresponding author. E-mail address: p.angeli@ucl.ac.uk

## Table of Contents

|                                                   |    |
|---------------------------------------------------|----|
| Structure of surfactant molecules.....            | S3 |
| Appendix A - Theory for surfactant mixtures ..... | S3 |
| Appendix B - Supplementary Material.....          | S6 |
| References.....                                   | S8 |

## Table of Figures

|                                                                                                                                                                                                                                                                                                                                                                                                      |    |
|------------------------------------------------------------------------------------------------------------------------------------------------------------------------------------------------------------------------------------------------------------------------------------------------------------------------------------------------------------------------------------------------------|----|
| <b>Fig. S1</b> Representative structure for NaDDBS .....                                                                                                                                                                                                                                                                                                                                             | S3 |
| <b>Fig. S2</b> Representative structure for EOT.....                                                                                                                                                                                                                                                                                                                                                 | S3 |
| <b>Fig. S3</b> Dynamic surface tension measurements for the (a) $n_{\text{EOT}} = 0.1n_{\text{NaDDBS}}$ (CMC = $3.92 \times 10^{-2} \text{ mol m}^{-3}$ ) and (b) $n_{\text{EOT}} = n_{\text{NaDDBS}}$ (CMC = $1.72 \times 10^{-2} \text{ mol m}^{-3}$ ) premixed surfactant mixtures cases. The last curve in both graphs, represents total bulk concentrations above the CMC of the mixtures. .... | S6 |
| <b>Fig. S4</b> Dynamic surface tension measurements for the $n_{\text{EOT}} = 0.1n_{\text{NaDDBS}}$ add one by one surfactant mixtures case: (a) (1) anionic (2) non-ionic and (b) (1) non-ionic (2) anionic. The elapsed time that corresponds to the addition of EOT and NaDDBS is shown for $c_{\text{total}} = 3.92 \times 10^{-3} \text{ mol m}^{-3}$ , indicatively. ....                      | S6 |
| <b>Fig. S5</b> Dynamic surface tension measurements for the $n_{\text{EOT}} = n_{\text{NaDDBS}}$ add one by one surfactant mixtures case: (a) (1) anionic (2) non-ionic and (b) (1) non-ionic (2) anionic. The elapsed time that corresponds to the addition of EOT and NaDDBS is shown for $c_{\text{total}} = 1.72 \times 10^{-2} \text{ mol m}^{-3}$ , indicatively. ....                         | S7 |



$$\frac{1}{CMC_{theor}} = \sum_{i=1}^n \frac{\alpha_i}{f_i^M CMC_i} \quad (S1)$$

where,  $\alpha_i$  is the stoichiometric mole fraction,  $CMC_i$  (mol m<sup>-3</sup>) is the critical micelle concentration and  $f_i^M$  is the activity coefficient of the i<sup>th</sup> surfactant in the mixture. The activity coefficients account for the ideality of mixing.<sup>8,9</sup>

The critical micelle concentration of a mixture containing similarly structured ionic or non-ionic surfactants can be well predicted by assuming that the ideal solution theory is obeyed in the micellar phase. In this case,  $f_i^M = 1$  and Clint's model<sup>10</sup> can be obtained from equation (S1) and reads:<sup>11</sup>

$$\frac{1}{CMC_{ideal}} = \sum_{i=1}^n \frac{\alpha_i}{CMC_i} \quad (S2)$$

The interaction parameter  $\beta^M$  among surfactants in mixed micelles, according to the regular solution theory, can be calculated as:<sup>12</sup>

$$\beta^M = \frac{\ln \frac{CMC_{exp} \alpha_i}{CMC_i X_i^M}}{X_j^{M2}} \text{ or } \beta^M = \frac{\ln \frac{CMC_{exp} \alpha_i}{CMC_i X_i^M}}{(1 - X_i^M)^2} \quad (S3)$$

where,  $X_i^M$  and  $X_j^M$  are the micellar mole fractions of i and j components, and  $CMC_{exp}$  (mol m<sup>-3</sup>) is the critical micelle concentration value of the mixture, as determined experimentally.

The interaction parameter  $\beta^M$ , is defined as the change in the enthalpy of a system when two surfactants are mixed<sup>12</sup> and provides information on the degree of association among the surfactants in the mixed micelles,<sup>9</sup> relative to the self-interactions of the individual surfactants before mixing.<sup>13,14</sup> When  $\beta^M = 0$  mixing is ideal, when  $\beta^M < 0$  mixing is not ideal and there is negative deviation from ideal mixing while when  $\beta^M > 0$  surfactants are incompatible and micellar demixing occurs. The more negative the values of  $\beta^M$  are, the stronger the interactions among the surfactants.<sup>15</sup> Large negative values of  $\beta^M$  can be observed in the case of two oppositely charged surfactants. Positive values of  $\beta^M$  are noted rarely and mainly in mixtures of surfactants with hydrocarbon and fluorocarbon tails.<sup>16,17</sup> Positive values of  $\beta^M$  may suggest that micellar demixing occurs.<sup>18</sup> Values of  $\beta^M$  equal to zero are expected when surfactants of the same class, i.e., surfactants with same headgroups, are mixed.<sup>17</sup>

The micellar mole fraction of the surfactants, e.g., the  $i^{\text{th}}$  surfactant ( $X_i^M$ ), is calculated from:

13

$$\frac{(X_i^M)^2 \ln \frac{CMC_{exp} \alpha_i}{CMC_i X_i^M}}{(1 - X_i^M)^2 \ln \frac{CMC_{exp} (1 - \alpha_i)}{CMC_j (1 - X_i^M)}} = 1 \quad (\text{S4})$$

where,  $CMC_j$  is the critical micelle concentration of the  $j^{\text{th}}$  component in the mixture. This equation can be solved iteratively for  $X_i^M$ .<sup>12</sup>

In a similar way, the equations for the mixed micelles derived from Rubingh<sup>6</sup> have further been extended to the mixed layers by Rosen and Hua<sup>19</sup> and used to calculate the interaction parameter between surfactants at mixed layers formed at water/air interfaces.

The interaction parameter  $\beta^S$  between surfactants in mixed layers, can be calculated as follows:

19

$$\beta^S = \frac{\ln \frac{c_{total} \alpha_i}{c_i^0 X_i^S}}{X_j^{S^2}} \text{ or } \beta^S = \frac{\ln \frac{c_{total} \alpha_i}{c_i^0 X_i^S}}{(1 - X_i^S)^2} \quad (\text{S5})$$

where,  $X_i^S$  and  $X_j^S$  are the micellar mole fractions of surfactants  $i$  and  $j$  in the mixed layers,  $\alpha_i$  is the stoichiometric mole fraction of the  $i^{\text{th}}$  component in the mixture,  $c_i^0$  ( $\text{mol m}^{-3}$ ) is the concentration of the  $i^{\text{th}}$  surfactant in the bulk and  $c_{total}$  ( $\text{mol m}^{-3}$ ) is the bulk concentration of the mixture  $ij$ , at a given surface tension value.

Again, the interaction parameter  $\beta^S$ , provides information on how attractive or repulsive are the interactions between surfactants in the mixed layers, relative to the self-interactions of the individual surfactants before mixing.<sup>19</sup>

Finally, to calculate the mole fraction of the  $i^{\text{th}}$  surfactant at mixed layers, the equation below can be implemented:<sup>19</sup>

$$\frac{(X_i^S)^2 \ln \frac{c_{total} \alpha_i}{c_i^0 X_i^S}}{(1 - X_i^S)^2 \ln \frac{c_{total} (1 - \alpha_i)}{c_j^0 (1 - X_i^S)}} = 1 \quad (\text{S6})$$

where  $c_j^0$  ( $\text{mol m}^{-3}$ ) is the concentration of the  $j^{\text{th}}$  surfactant in the bulk, at a given surface tension value.

## Appendix B - Supplementary Material

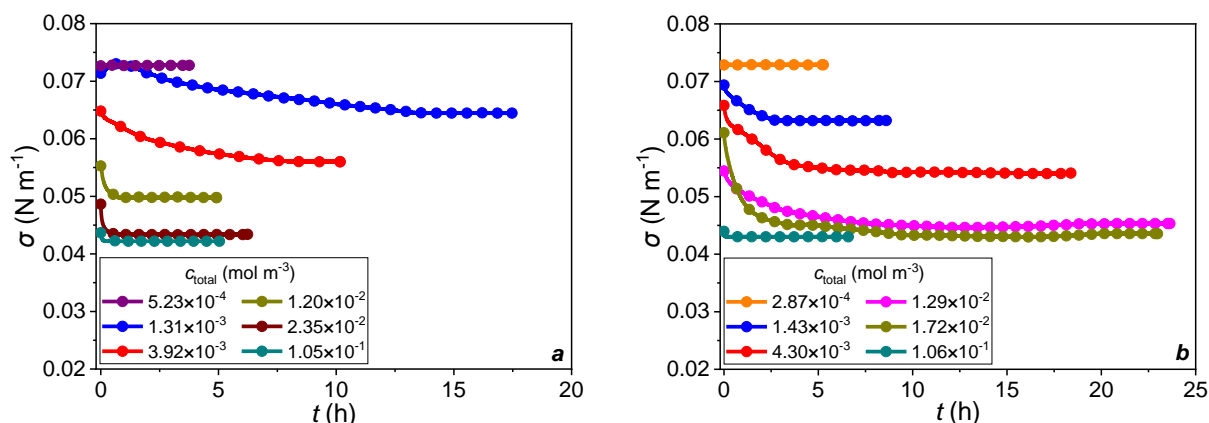

**Fig. S3** Dynamic surface tension measurements for the (a)  $n_{\text{EOT}} = 0.1 n_{\text{NaDDBS}}$  (CMC =  $3.92 \times 10^{-2}$  mol m<sup>-3</sup>) and (b)  $n_{\text{EOT}} = n_{\text{NaDDBS}}$  (CMC =  $1.72 \times 10^{-2}$  mol m<sup>-3</sup>) premixed surfactant mixtures cases. The last curve in both graphs, represents total bulk concentrations above the CMC of the mixtures.

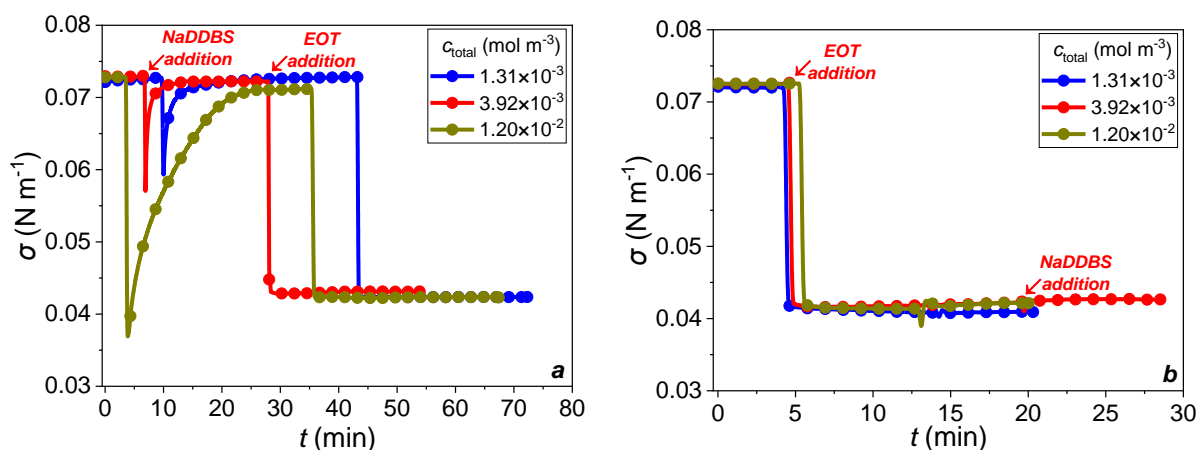

**Fig. S4** Dynamic surface tension measurements for the  $n_{\text{EOT}} = 0.1 n_{\text{NaDDBS}}$  add one by one surfactant mixtures case: (a) (1) anionic (2) non-ionic and (b) (1) non-ionic (2) anionic. The elapsed time that corresponds to the addition of EOT and NaDDBS is shown for  $c_{\text{total}} = 3.92 \times 10^{-3}$  mol m<sup>-3</sup>, indicatively.

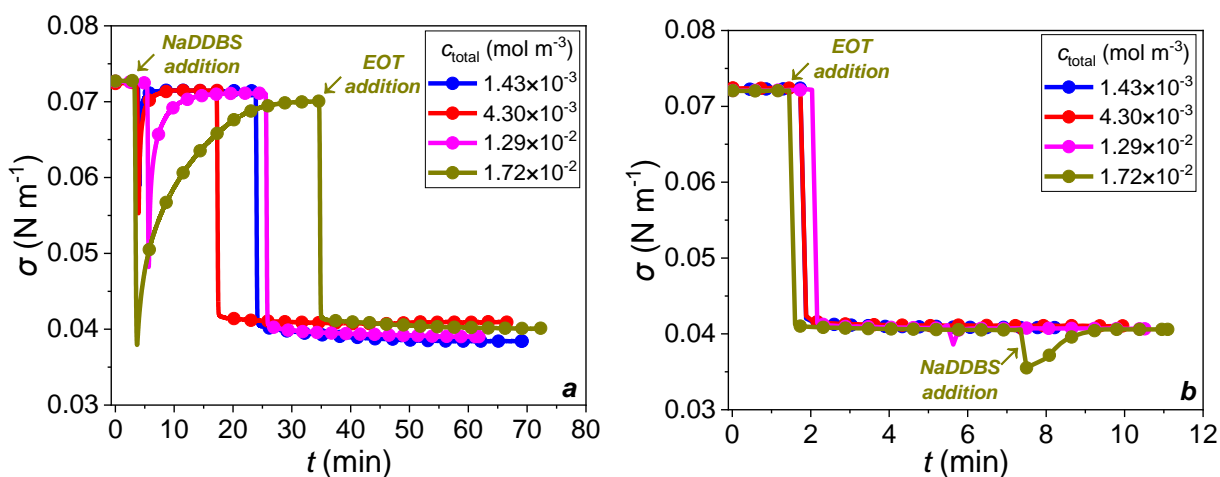

**Fig. S5** Dynamic surface tension measurements for the  $n_{\text{EOT}} = n_{\text{NaDDBS}}$  add one by one surfactant mixtures case: (a) (1) anionic (2) non-ionic and (b) (1) non-ionic (2) anionic. The elapsed time that corresponds to the addition of EOT and NaDDBS is shown for  $c_{\text{total}} = 1.72 \times 10^{-2} \text{ mol m}^{-3}$ , indicatively.

## References

1. K. Szymczyk and B. Jańczuk, *Langmuir*, 2007, **23**, 4972–4981.
2. L. Huang and P. Somasundaran, *Langmuir*, 1997, **13**, 6683–6688.
3. J. F. Scamehorn, *An Overview of Phenomena Involving Surfactant Mixtures*, 1986.
4. P. C. Griffiths, M. L. Whatton, R. J. Abbott, W. Kwan, A. R. Pitt, A. M. Howe, S. M. King and R. K. Heenan, *J. Colloid Interface Sci.*, 1999, **215**, 114–123.
5. T. Okano, T. Tamura, Y. Abe, T. Tsuchida, S. Lee and G. Sugihara, *Langmuir*, 2000, **16**, 1508–1514.
6. K. L. Mital, *Solution Chemistry of Surfactants*, 1979.
7. P. M. Holland and D. N. Rubingh, *J. Phys. Chem.*, 1983, **87**, 1984–1990.
8. P. M. Holland, *Adv. Colloid Interface Sci.*, 1986, **26**, 111–129.
9. R. K. Mahajan and D. Nandni, *Ind. Eng. Chem. Res.*, 2012, **51**, 3338–3349.
10. J. H. Clint, *Surfactant Aggregation*, 1992.
11. J. H. Clint, *J. Chem. Soc., Faraday Trans. 1*, 1975, **71**, 1327–1334.
12. A. Thibaut, A. Misselyn-Bauduin, J. Grandjean, G. Broze and R. Jérôme, *Langmuir*, 2000, **16**, 9192–9198.
13. Q. Zhou and M. J. Rosen, *Langmuir*, 2003, **19**, 4555–4562.
14. A. Bagheri and P. Khalili, *RSC Adv.*, 2017, **7**, 18151–18161.
15. H. Bélarbi, D. Bendedouch and F. Bouanani, *J. Surfactants Deterg.*, 2010, **13**, 433–439.
16. B. Kronberg, *Curr. Opin. Colloid Interface Sci.*, 1997, **2**, 456–463.
17. B. Kronberg, K. Holmberg and B. Lindman, *Surface Chemistry of Surfactants and Polymers*, 2014.
18. A. M. Misselyn-Bauduin, A. Thibaut, J. Grandjean, G. Broze and R. Jerome, *Langmuir*, 2000, **16**, 4430–4435.
19. M. J. Rosen and X. Y. Hua, *J. Colloid Interface Sci.*, 1982, **86**, 164–172.
